# Supplementary material
Source: PubMed Central journal article supplement (PMC3414597)
Supplement: supp_110950_iron-vaucher-1-at.pdf [file supp_110950_iron-vaucher-1-at.pdf]

**Appendix 1 (as supplied by the authors):** Mean values of biological markers with 95% confidence intervals for groups receiving iron supplements (n = 102) or placebo (n = 96) after 6 and 12 weeks of treatment.

### A. Haemoglobin

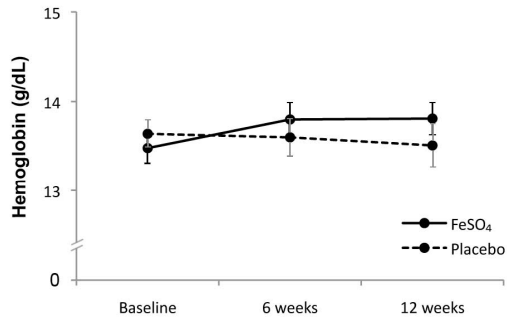

### B. Ferritin

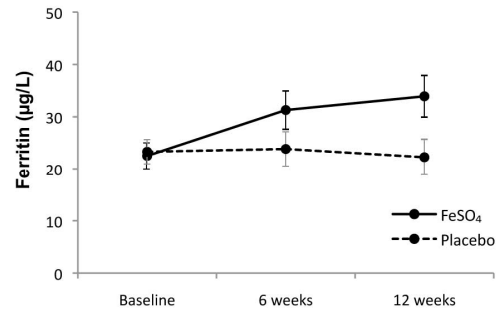

### C. Mean Corpuscular Volume

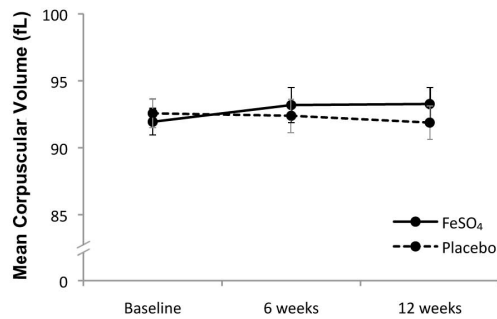

### D. Haematocrit

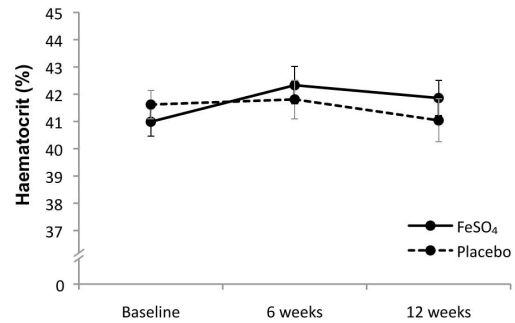

### E. Soluble Transferrin Receptor

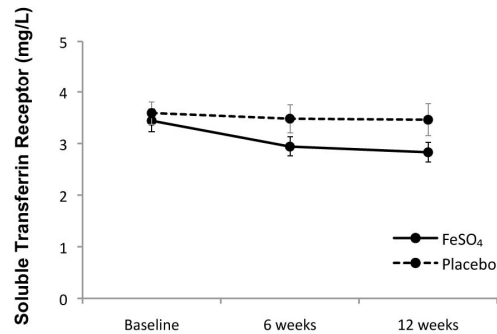

### F. Transferrin Saturation

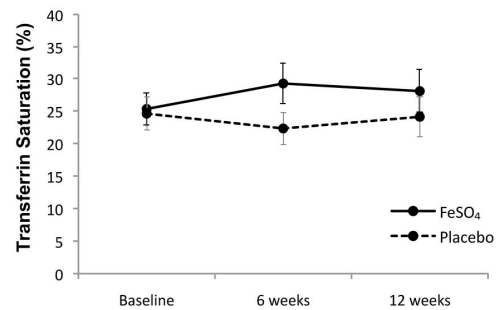

Appendix to: Vaucher P, Druais P-L, Waldvogel S, et al. Effect of iron supplementation on fatigue in nonanemic menstruating women with low ferritin: a randomized controlled trial. *CMAJ* 2012.

DOI:10.1503/cmaj.110950.

Copyright © 2012 Canadian Medical Association or its licensors.
