# Supplementary material
Source: PubMed Central journal article supplement (PMC3414597)
Supplement: supp_110950_iron-vaucher-2-at.pdf [file supp_110950_iron-vaucher-2-at.pdf]

**Appendix 2 (as supplied by the authors):** Effects of treatment in patients with initial concentrations of hemoglobin below (N=44) or above (N=127) 13.0 g/dL, for ferritin below (N=50) or above (N=124) 15 ug/dL, and for transferrin saturation below (N=69) or above (N=105) 20%; analysis is not intention-to-treat as missing data was not accounted for.

|                                       | Treatment effect by sub-<br>groups*<br>Δ [95%CI] | P Value        |
|---------------------------------------|--------------------------------------------------|----------------|
| <b>CAPPS score for fatigue [0-40]</b> |                                                  |                |
| Hemoglobin < 13.0 g/dL                | -5.6 units [-10.8;-0.5]                          | P=0.033        |
| Hemoglobin ≥ 13.0 g/dL                | -2.5 units [-6.4;1.3]                            | P=0.194        |
| Interaction term                      |                                                  | <b>P=0.319</b> |
| Ferritin < 15 ug/L                    | -2.5 units [-7.5;2.5]                            | P=0.322        |
| Ferritin ≥ 15 ug/L                    | -5.4 units [-9.3;-1.4]                           | P=0.008        |
| Interaction term                      |                                                  | <b>P=0.098</b> |
| Transferrin saturation ≤20%           | -1.3 units [-6.4;3.7]                            | P=0.605        |
| Transferrin saturation >20%           | -4.6 units [-8.9;-0.4]                           | P=0.033        |
| Interaction term                      |                                                  | <b>P=0.391</b> |
| <b>SF-12 [0-100]</b>                  |                                                  |                |
| Hemoglobin < 13.0 g/dL                | 6.6 units [0.7;12.5]                             | P=0.028        |
| Hemoglobin ≥ 13.0 g/dL                | 1.4 units [-3.2;5.9]                             | P=0.552        |
| Interaction term                      |                                                  | <b>P=0.281</b> |
| Ferritin < 15 ug/L                    | -0.1 units [-6.1;6.0]                            | P=0.981        |
| Ferritin ≥ 15 ug/L                    | 4.0 units [-0.7;8.7]                             | P=0.091        |
| Interaction term                      |                                                  | <b>P=0.453</b> |
| Transferrin saturation ≤20%           | 4.5 units [-1.6;10.5]                            | P=0.145        |
| Transferrin saturation >20%           | 2.3 units [-2.7;7.4]                             | P=0.360        |
| Interaction term                      |                                                  | <b>P=0.652</b> |
| <b>Hemoglobin (g/dL)</b>              |                                                  |                |
| Hemoglobin < 13.0 g/dL                | 1.1 g/dL [0.7;1.4]                               | P<0.001        |
| Hemoglobin ≥ 13.0 g/dL                | 0.06 g/dL [-0.2;0.3]                             | P=0.664        |
| Interaction term                      |                                                  | <b>P=0.001</b> |
| Ferritin < 15 ug/L                    | 0.52 g/dL [0.2;0.9]                              | P=0.005        |
| Ferritin ≥ 15 ug/L                    | 0.20 g/dL [-0.1;0.5]                             | P=0.172        |
| Interaction term                      |                                                  | <b>P=0.063</b> |
| Transferrin saturation ≤20%           | 0.19 g/dL [-0.2;0.6]                             | P=0.317        |
| Transferrin saturation >20%           | 0.32 g/dL [0.0;0.6]                              | P=0.049        |
| Interaction term                      |                                                  | <b>P=0.810</b> |

\* Cut-offs for hemoglobin were used independently from the cut-offs of 15 µg/L or less for ferritin or transferrin saturation of 20%.
